# Supplementary material for: Low Prevalence of Substandard and Falsified Antimalarial and Antibiotic Medicines in Public and Faith-Based Health Facilities of Southern Malawi
Source: PubMed Central journal article supplement (PMC5417205; doi:10.4269/ajtmh.16-1008), 2017-05-03
Supplement: SD4.pdf [file SD4.pdf]

SUPPLEMENTAL TABLE 1  
Quoted costs of pharmacopeial analysis of all medicine samples collected in this study, compared with purchasing cost of these medicines

| Type of medicine                                | No. of samples collected | Quoted cost of analysis for first sample (US\$) <sup>a</sup> | Quoted cost of analysis for each subsequent sample (US\$) <sup>b</sup> | Cost of analysis for all samples (US\$) <sup>c</sup> | Size of each sample (units) | Total units collected | MSH reference price per unit (U.S. cent) <sup>d</sup> | Purchasing costs of total units collected (US\$) | Units required per course of treatment (= COT) <sup>e</sup> | Cost per COT | No. of COTs possible with units collected | No. of COTs possible with US\$245,051.25 |
|-------------------------------------------------|--------------------------|--------------------------------------------------------------|------------------------------------------------------------------------|------------------------------------------------------|-----------------------------|-----------------------|-------------------------------------------------------|--------------------------------------------------|-------------------------------------------------------------|--------------|-------------------------------------------|------------------------------------------|
| Artemether/lumefantrine 20 mg/120 mg tbl        | 26                       | 3,960.00                                                     | 2,970.00                                                               | 78,210.00                                            | 150                         | 3,900                 | 17.03                                                 | 664.17                                           | 24                                                          | 4.09         | 163                                       | 21,598                                   |
| Sulfadoxine/pyrimethamine 500 mg/25 mg tbl      | 28                       | 2,180.00                                                     | 1,635.00                                                               | 46,325.00                                            | 150                         | 4,200                 | 3.73                                                  | 156.66                                           | 3                                                           | 0.11         | 1,400                                     | 186,077                                  |
| Quinine hydrochloride inj. 300 mg/mL, 2 mL vial | 12                       | 1,585.00                                                     | 1,188.75                                                               | 14,661.25                                            | 50                          | 600                   | 24.00                                                 | 144.00                                           | 6                                                           | 1.44         | 100                                       | 13,291                                   |
| Phenoxymethylpenicillin 250 mg tbl              | 9                        | 1,345.00                                                     | 1,008.75                                                               | 9,415.00                                             | 150                         | 1,350                 | 1.72                                                  | 23.22                                            | 56                                                          | 0.96         | 24                                        | 3,204                                    |
| Amoxicillin 250 mg cps/tbl                      | 19                       | 1,075.00                                                     | 806.25                                                                 | 15,587.50                                            | 150                         | 2,850                 | 1.84                                                  | 52.44                                            | 42                                                          | 0.77         | 68                                        | 9,019                                    |
| Artesunate/Amodiaquine 100 mg/270 mg tbl        | 6                        | 2,950.00                                                     | 2,212.50                                                               | 14,012.50                                            | 150                         | 900                   | 25.00                                                 | 225.00                                           | 6                                                           | 1.50         | 150                                       | 19,937                                   |
| Quinine sulfate 300 mg tbl                      | 12                       | 1,830.00                                                     | 1,372.50                                                               | 16,927.50                                            | 150                         | 1,800                 | 6.38                                                  | 114.84                                           | 42                                                          | 2.68         | 43                                        | 5,696                                    |
| Ciprofloxacin 250 mg tbl                        | 21                       | 1,375.00                                                     | 1,031.25                                                               | 22,000.00                                            | 150                         | 3,150                 | 2.13                                                  | 67.10                                            | 28                                                          | 0.60         | 113                                       | 14,953                                   |
| Amoxicillin/clavulanic acid 500/125 mg tbl      | 3                        | 1,950.00                                                     | 1,462.50                                                               | 4,875.00                                             | 150                         | 450                   | 20.00                                                 | 90.00                                            | 21                                                          | 4.20         | 21                                        | 2,848                                    |
| Chloramphenicol 250 mg cps                      | 12                       | 1,075.00                                                     | 806.25                                                                 | 9,943.75                                             | 150                         | 1,800                 | 2.55                                                  | 45.90                                            | 40                                                          | 1.02         | 45                                        | 5,981                                    |
| Dihydroartemisinin/piperazine 40 mg/320 mg tbl  | 3                        | 3,450.00                                                     | 2,587.50                                                               | 8,625.00                                             | 150                         | 450                   | 40.09                                                 | 180.41                                           | 9                                                           | 3.61         | 50                                        | 6,646                                    |
| Cefuroxime (as axetil) 250 mg tbl               | 4                        | 1,375.00                                                     | 1,031.25                                                               | 4,468.75                                             | 150                         | 600                   | 13.33                                                 | 79.98                                            | 14                                                          | 1.87         | 43                                        | 5,696                                    |
| Total                                           | 155                      |                                                              |                                                                        | 245,051.25                                           |                             |                       |                                                       | 1,843.71                                         |                                                             |              | 2,219                                     | 294,946                                  |

Excluding the very inexpensive sulfadoxine/pyrimethamine treatment, the number of COTs possible with US\$245,051.25 would result as 108,869. Even this smaller number does not change the argument that a country like Malawi cannot afford to leave such a number of patients untreated to analyze 155 medicine samples.

<sup>a</sup>Quotation from a World Health Organization-prequalified laboratory in South Africa for pharmacopeial analysis of the medicines investigated in this study.

<sup>b</sup>Median supplier price from International Drug Price Indicator Guide.<sup>42</sup>

<sup>c</sup>According to Malawi Standard Treatment Guidelines, 2015.<sup>31</sup>
